# Supplementary material
Source: MDPI journal article supplement (https://www.mdpi.com/2073-4433/12/1/39)
Supplement: s1 [file s1]

Supplementary Table 1 The time span of ice cores presented in Figure 3

| Ice core | Time span |
|----------|-----------|
| Crete    | 1950-1973 |
| DYE-3    | 1950-1978 |
| GRIP     | 1950-1979 |
| GISP2    | 1950-1970 |
| Milcent  | 1950-1970 |
| Renland  | 1950-1970 |
| Site A   | 1950-1985 |
| Site B   | 1950-1970 |
| Site D   | 1950-1970 |
| Site E   | 1950-1970 |
| Site G   | 1950-1970 |

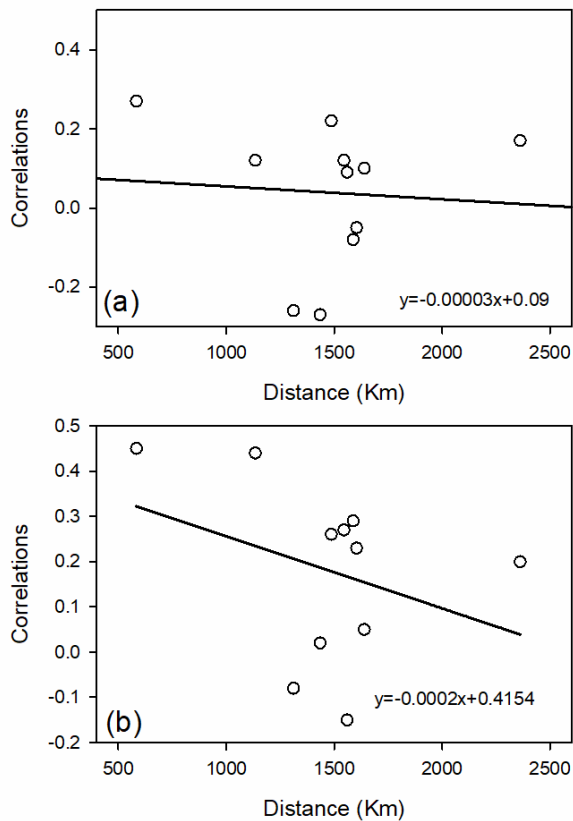

Figure S1 The linear regression of correlations between tree ring oxygen isotopes with summer (a) and winter (b) ice core oxygen isotope with that of distances between tree ring sampling site and ice core sites presented in Figure 3.

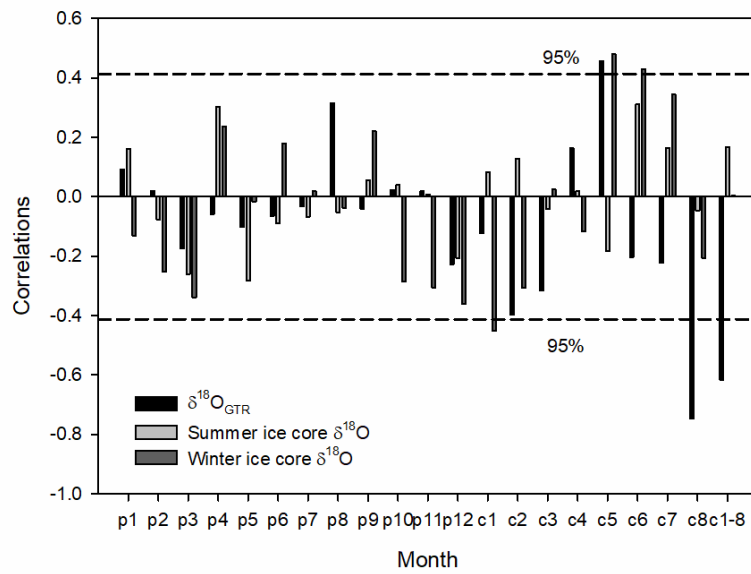

Figure S2 Correlations between tree ring oxygen isotope with NAO/AO during the period of 1950-1970. Numbers in x-axis represent the months of the year, and numbers with a “p” and “c” prefix indicate the previous year and current year, respectively.
